# Supplementary material for: Plasma levels of DPP4 activity and sDPP4 are dissociated from inflammation in mice and humans
Source: PubMed Central journal article supplement (PMC7387453; doi:10.1038/s41467-020-17556-z), 2020-07-28
Supplement: 41467_2020_17556_MOESM1_ESM.pdf [file 41467_2020_17556_MOESM1_ESM.pdf]

**Supplementary Table 1: Baseline participant characteristics according to randomized treatment and baseline metformin**

|                                          | <b>Sitagliptin and no metformin (N=146)</b> | <b>Sitagliptin and metformin (N=149)</b> | <b>Placebo and no metformin (N=149)</b> | <b>Placebo and metformin (N=148)</b> |
|------------------------------------------|---------------------------------------------|------------------------------------------|-----------------------------------------|--------------------------------------|
| <b>Age at Randomization (yrs)</b>        | 68 (60, 72)                                 | 67 (61, 73)                              | 68 (62, 73)                             | 70 (62, 74)                          |
| <b>Female sex</b>                        | 39 (26.7%)                                  | 43 (28.9%)                               | 42 (28.2%)                              | 53 (35.8%)                           |
| <b>BMI (kg/m<sup>2</sup>)</b>            |                                             |                                          |                                         |                                      |
| <b>≤30</b>                               | 72 (49.3%)                                  | 74 (49.7%)                               | 74 (49.7%)                              | 73 (49.3%)                           |
| <b>&gt;30</b>                            | 74 (50.7%)                                  | 75 (50.3%)                               | 75 (50.3%)                              | 75 (50.7%)                           |
| <b>Qualifying HbA1c (%)</b>              | 7.3 (7.0, 7.7)                              | 7.2 (6.9, 7.7)                           | 7.3 (6.8, 7.7)                          | 7.4 (6.9, 7.7)                       |
| <b>Duration of type 2 diabetes (yrs)</b> | 12 (7, 21)                                  | 13 (6, 20)                               | 13 (8, 22)                              | 12 (6, 20)                           |
| <b>DPP4 activity (mU/mL)</b>             | 3.7 (3.2, 4.3)                              | 3.4 (3.0, 3.9)                           | 3.8 (3.3, 4.3)                          | 3.6 (3.1, 4.1)                       |
| <b>sDPP4 protein (ng/mL)</b>             | 569 (479, 700)                              | 525 (445, 631)                           | 582 (514, 697)                          | 556 (450, 693)                       |
| <b>CRP (μg/mL)</b>                       | 2.5 (1.1, 5.5)                              | 1.8 (0.8, 5.0)                           | 2.9 (1.1, 7.1)                          | 2.4 (0.9, 4.0)                       |
| <b>IL-6 (pg/mL)</b>                      | 1.2 (0.8, 1.9)                              | 0.9 (0.6, 1.3)                           | 1.3 (0.8, 2.0)                          | 1.0 (0.8, 1.5)                       |
| <b>TNFα (pg/mL)</b>                      | 2.7 (2.2, 3.3)                              | 2.7 (2.1, 3.2)                           | 2.9 (2.1, 3.5)                          | 2.7 (2.2, 3.3)                       |
| <b>MCP-1 (pg/mL)</b>                     | 171 (135, 208)                              | 166 (144, 197)                           | 182 (149, 213)                          | 161 (137, 189)                       |

Data are summarized as number (percentage) for categorical variables and median (25<sup>th</sup>, 75<sup>th</sup> percentile) for continuous variables. BMI, body mass index.

**Supplementary Table 2: Association of baseline metformin and baseline biomarkers adjusted for clinical covariates**

| <b>Baseline log base-2 transformed biomarker</b> | <b>N</b> | <b>Least squares means for no baseline metformin</b> | <b>Least squares means for baseline metformin use</b> | <b>Difference in least squares means</b> | <b>F</b> | <b>p</b> |
|--------------------------------------------------|----------|------------------------------------------------------|-------------------------------------------------------|------------------------------------------|----------|----------|
| <b>sDPP4</b>                                     | 592      | 9.20 (9.15, 9.25)                                    | 9.11 (9.06, 9.16)                                     | -0.09 (-0.16, -0.02)                     | 7.27     | 0.007    |
| <b>DPP4 activity</b>                             | 592      | 1.88 (1.84, 1.93)                                    | 1.80 (1.75, 1.84)                                     | -0.09 (-0.15, -0.02)                     | 6.73     | 0.010    |
| <b>CRP</b>                                       | 592      | 1.51 (1.32, 1.71)                                    | 1.12 (0.92, 1.32)                                     | -0.39 (-0.67, -0.11)                     | 7.59     | 0.006    |
| <b>IL-6</b>                                      | 592      | 0.35 (0.23, 0.47)                                    | 0.05 (-0.07, 0.17)                                    | -0.30 (-0.48, -0.12)                     | 11.28    | <0.001   |
| <b>TNF<math>\alpha</math></b>                    | 592      | 1.49 (1.43, 1.55)                                    | 1.37 (1.31, 1.43)                                     | -0.12 (-0.20, -0.03)                     | 7.02     | 0.008    |
| <b>MCP-1</b>                                     | 592      | 7.46 (7.41, 7.52)                                    | 7.37 (7.32, 7.43)                                     | -0.09 (-0.17, -0.01)                     | 5.31     | 0.022    |

P values are two-sided and derived from multiple linear regression models. No adjustments were made for multiple comparisons.

**Supplementary Table 3. Correlation of sDPP4 protein with other markers at 12 months**

| <b>Month 12 biomarker</b>     | <b>N</b> | <b>Spearman correlation</b> | <b>p-value</b> |
|-------------------------------|----------|-----------------------------|----------------|
| <b>DPP-4 activity (mU/mL)</b> | 592      | 0.38                        | <0.001         |
| <b>CRP (µg/mL)</b>            | 592      | -0.06                       | 0.158          |
| <b>IL-6 (pg/mL)</b>           | 592      | -0.11                       | 0.005          |
| <b>TNFα (pg/mL)</b>           | 592      | -0.05                       | 0.261          |
| <b>MCP-1 (pg/mL)</b>          | 592      | -0.03                       | 0.430          |

P values are two-sided and derived from Spearman correlation. No adjustments were made for multiple comparisons.

Supplementary Table 4: qPCR primers for Taqman gene expression

| <b>Gene</b>               | <b>Description</b>                            | <b>Assay ID</b> |
|---------------------------|-----------------------------------------------|-----------------|
| <b><i>Adgre1</i></b>      | Adhesion G protein-coupled receptor E1        | Mm00802529_m1   |
| <b><i>Alpi</i></b>        | Alkaline phosphatase, intestinal              | Mm01285814_g1   |
| <b><i>Cav 1</i></b>       | Caveolin 1                                    | Mm00483057_m1   |
| <b><i>Ccl2</i></b>        | C-C motif chemokine ligand 2                  | Mm00441242_m1   |
| <b><i>CD36</i></b>        | Cluster of differentiation 36                 | Mm00432403_m1   |
| <b><i>Col1a1</i></b>      | Collagen, type 1, alpha 1                     | Mm00801666_g1   |
| <b><i>Cyp7a1</i></b>      | Cytochrome P450 Family 7 Subfamily A Member 1 | Mm00484152_m1   |
| <b><i>Egfr</i></b>        | Epidermal growth factor receptor              | Mm00433023_m1   |
| <b><i>Fgfr4</i></b>       | Fibroblast growth factor receptor 4           | Mm01341852_m1   |
| <b><i>Gip</i></b>         | Glucose-dependent insulinotropic polypeptide  | Mm00433601_m1   |
| <b><i>Havcr1</i></b>      | Hepatitis A Virus Cellular Receptor 1         | Mm00506686_m1   |
| <b><i>Icam1</i></b>       | Intercellular Adhesion Molecule 1             | Mm00516023_m1   |
| <b><i>Ifng</i></b>        | Interferon gamma                              | Mm01168134_m1   |
| <b><i>Il10</i></b>        | Interleukin 10                                | Mm99999062_m1   |
| <b><i>Il12b</i></b>       | Interleukin 12b                               | Mm99999067_m1   |
| <b><i>Il18</i></b>        | Interleukin 18                                | Mm00434226_m1   |
| <b><i>Il1b</i></b>        | Interleukin 1b                                | Mm01336189_m1   |
| <b><i>Il25</i></b>        | Interleukin 25                                | Mm00499822_m1   |
| <b><i>Il33</i></b>        | Interleukin 33                                | Mm00505403_m1   |
| <b><i>Il6</i></b>         | Interleukin 6                                 | Mm00446190_m1   |
| <b><i>Lcn2</i></b>        | Lipocalin 2                                   | Mm01324470_m1   |
| <b><i>Lipc</i></b>        | Lipase C, hepatic type                        | Mm01171487_m1   |
| <b><i>Ocln</i></b>        | Occludin                                      | Mm00500912_m1   |
| <b><i>Ppia</i></b>        | Peptidylprolyl isomerase A                    | Mm02342430_g1   |
| <b><i>Reg3a</i></b>       | Regenerating family member 3 alpha            | Mm00441127_m1   |
| <b><i>Reg3b</i></b>       | Regenerating family member 3 beta             | Mm00440616_g1   |
| <b><i>Reg3g</i></b>       | Regenerating family member 3 gamma            | Mm00441127_m1   |
| <b><i>Rpl32</i></b>       | Ribosomal protein L32                         | Mm02528467_g1   |
| <b><i>Tbp</i></b>         | Tata box binding protein                      | Mm00446973_m1   |
| <b><i>Tff2</i></b>        | Trefoil factor 2                              | Mm00447491_m1   |
| <b><i>Tff3</i></b>        | Trefoil factor 3                              | Mm00495590_m1   |
| <b><i>Tgfb1</i></b>       | Transforming growth factor beta 1             | Mm01178820_m1   |
| <b><i>Tjp1 (ZO-1)</i></b> | Tight junction protein 1                      | Mm00493699_m1   |
| <b><i>Tlr4</i></b>        | Toll-like receptor 4                          | Mm00445273_m1   |
| <b><i>Tnfa</i></b>        | Tumour necrosis factor alpha                  | Mm00443258_m1   |
| <b><i>Tslp</i></b>        | Thymic stromal lymphopoietin                  | Mm00498739_m1   |

All primers are from Thermo-Fisher Scientific.

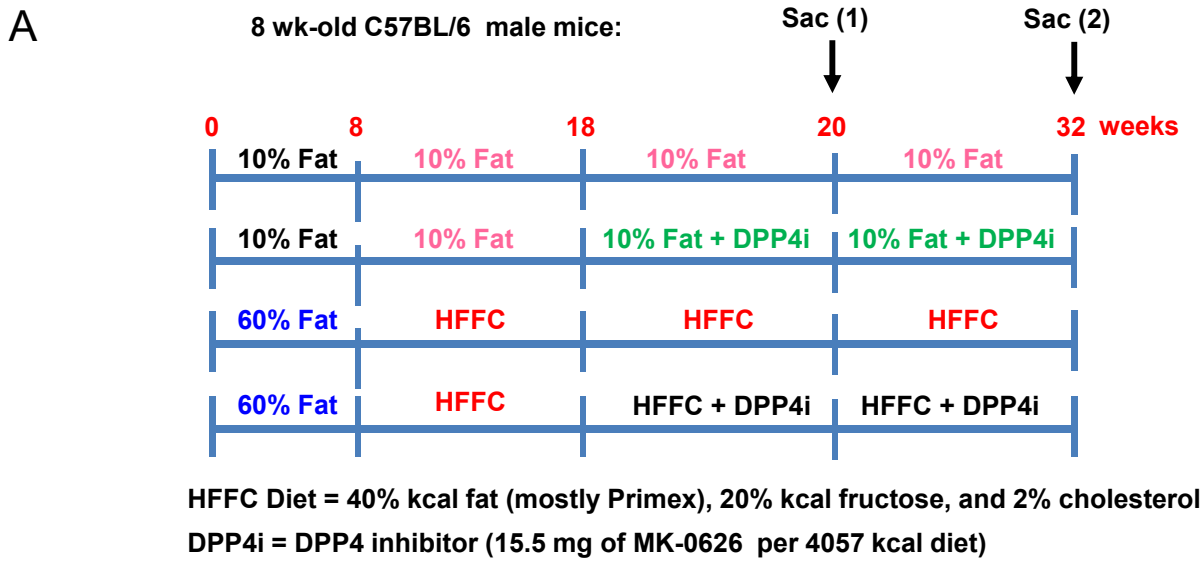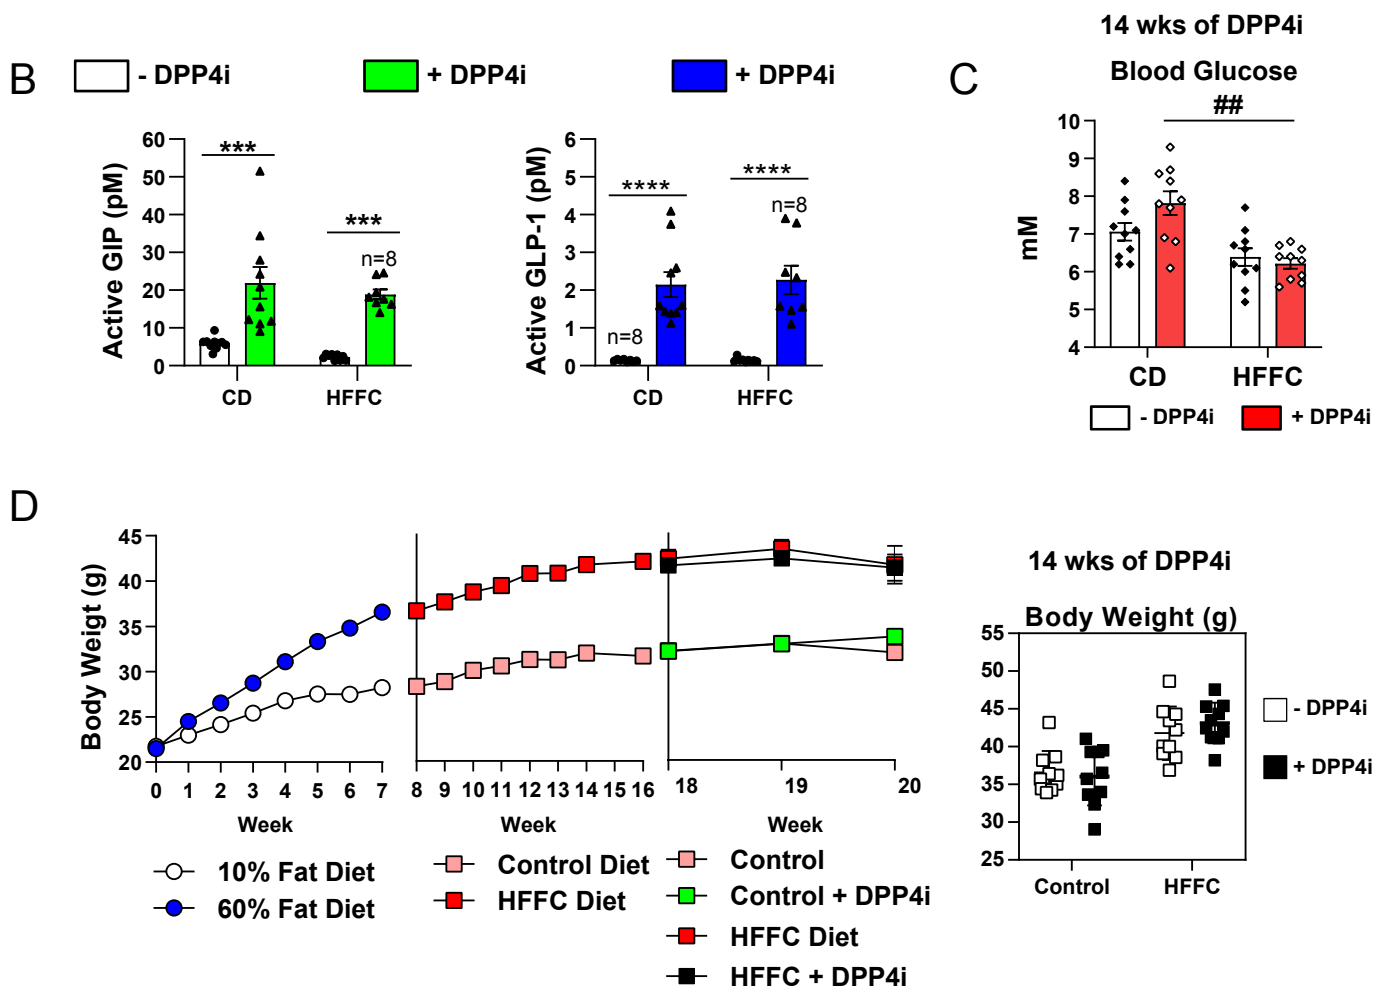

**Supplementary Figure 1. Long-term inhibition of DPP4 increases plasma levels of active GIP and GLP-1 but does not modify HFFC diet-induced weight gain in WT mice.** (A) Schematic depicting the diet regimen and time of sacrifice (Sac) in the WT mouse studies. (B) Five hour fasted plasma levels of active gastric inhibitory polypeptide (GIP) and glucagon-like peptide -1 (GLP-1) in WT mice that were maintained on control diet (CD) or high fat, fructose and cholesterol (HFFC) diet supplemented with (+) or without (-) the DPP4 inhibitor (DPP4i) MK-0626 for 14 wks. (C) Non-fasting blood glucose levels at the time of sacrifice in WT mice that were maintained on CD or HFFC diet supplemented with or without DPP4i. (D) Weekly body weights and body weights at the time of sacrifice in WT mice that were maintained on CD or HFFC diet supplemented with or without DPP4i. Data shown are mean  $\pm$  SEM. n=9 or 10 mice per group, except where n=8 as indicated on the graph above the data set. \*\*\* $P$ <0.001, \*\*\*\* $P$ <0.0001 vs. DPP4i-treated. ## $P$ <0.01 for CD vs. HFFC. Data in (B-D) were analyzed by two-way ANOVA. Source data are provided as a Source data file.

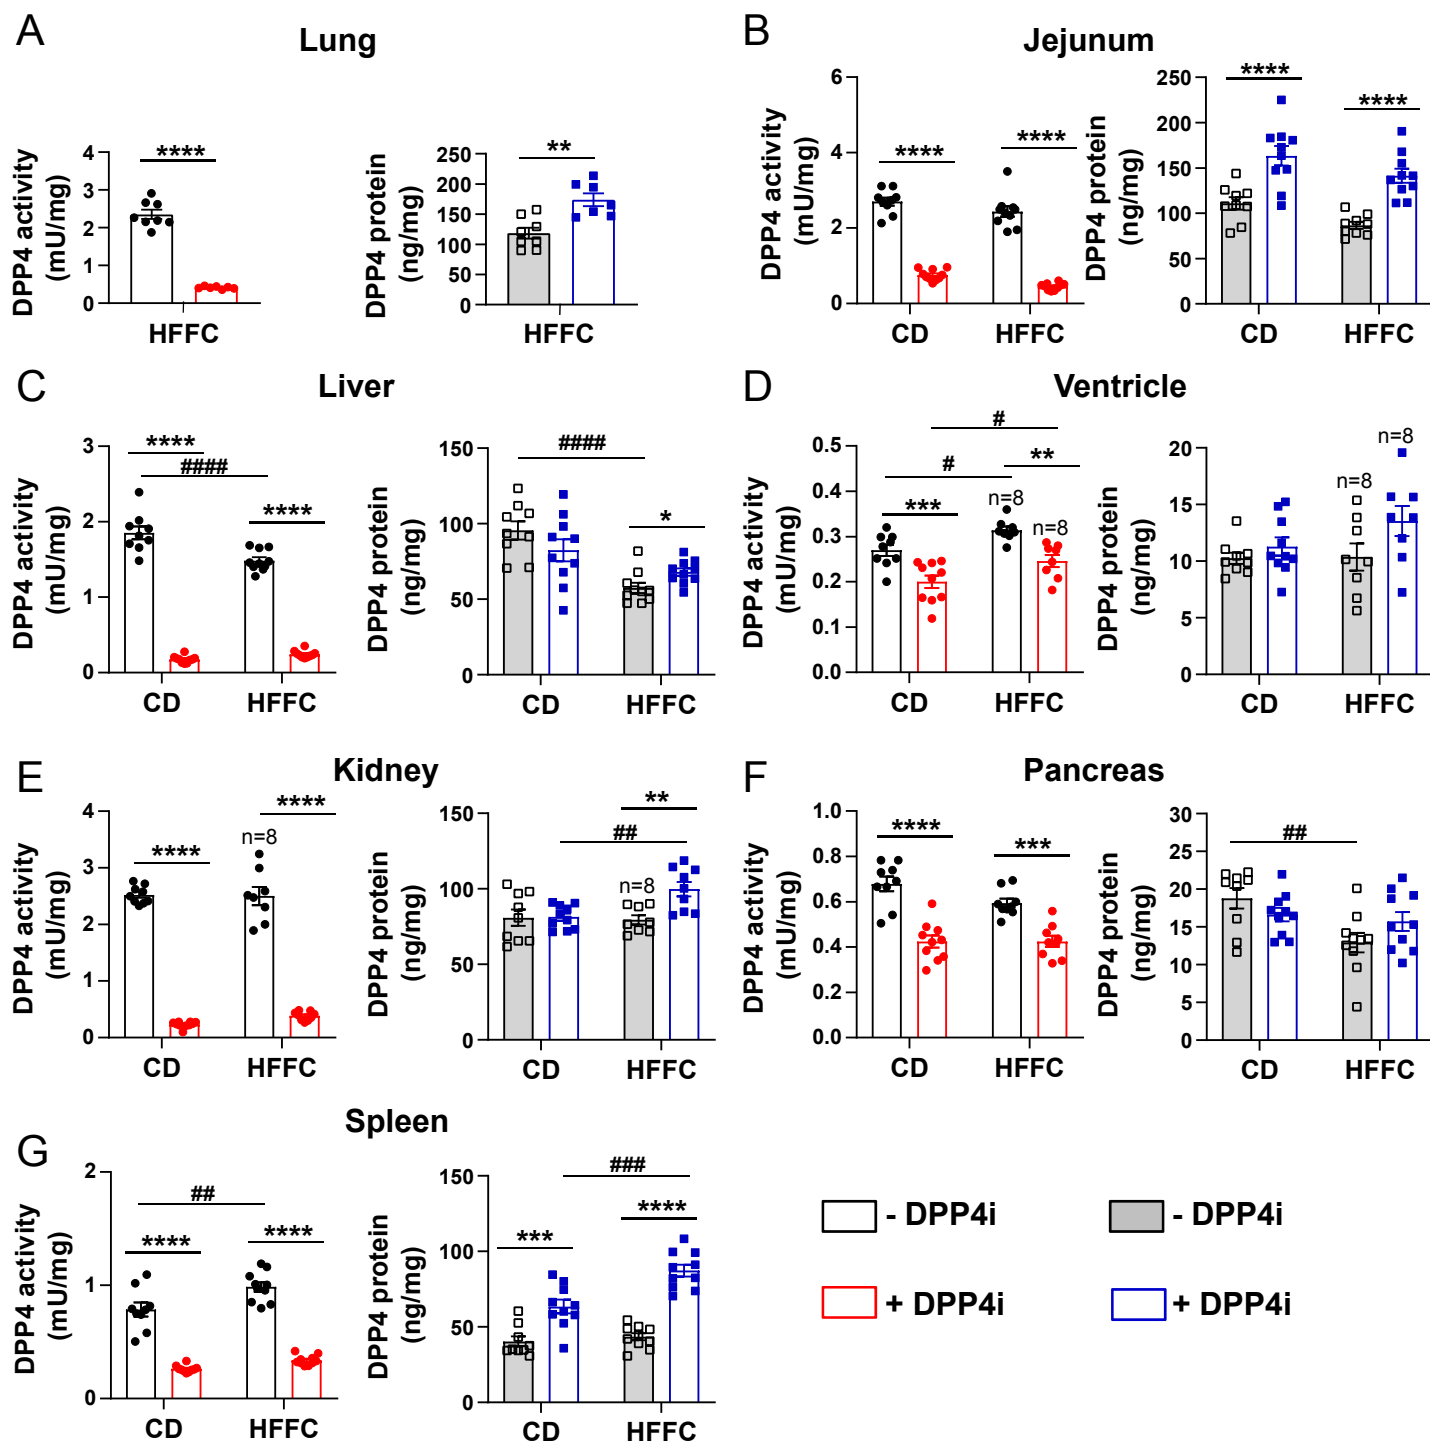

**Supplementary Figure 2. DPP4 activity and protein levels in tissues after 2 or 4 wks of DPP4i.** Levels of DPP4 activity (left panels) and protein (right panels) in (A) lung, (B) jejunum, (C) liver, (D) whole ventricle, (E) kidney, (F) pancreas and (G) spleen from mice that were maintained on control diet (CD) or a high fat, fructose and cholesterol (HFFC) diet for 10 weeks and then the same diets supplemented with (+) or without (-) the DPP4 inhibitor (DPP4i) MK-0626 for 4 (A) or 2 (B-G) wks. Data shown are mean  $\pm$  SEM. For A, n=7 or 8 mice per group. For B-G, n=9 or 10 mice per group, except where n=8 as indicated on the graph above the data set. \* $P$ <0.05, \*\* $P$ <0.01, \*\*\* $P$ <0.001, \*\*\*\* $P$ <0.0001 vs. DPP4i-treated. # $P$ <0.05, ## $P$ <0.01, ### $P$ <0.001, #### $P$ <0.0001 for CD vs. HFFC. Data were analyzed by two-sided unpaired Student's t-test (A) or two way ANOVA (B-G). Source data are provided as a Source data file.

A

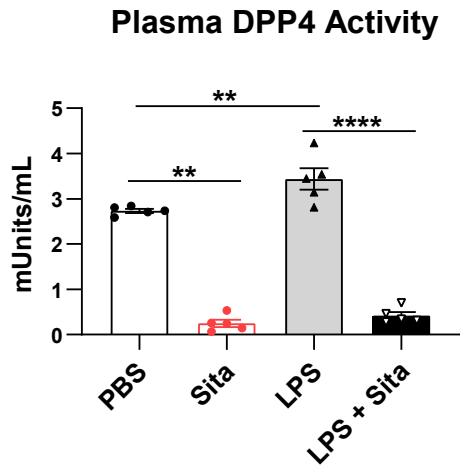

B

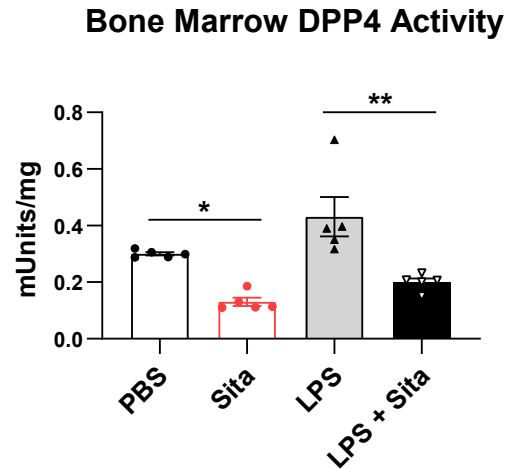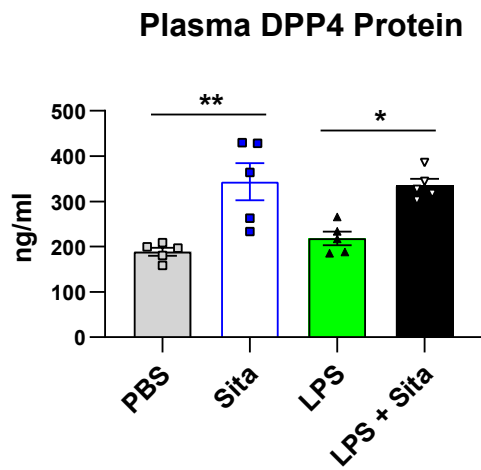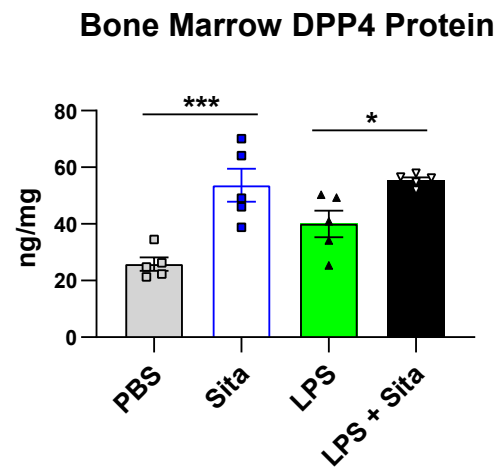

**Supplementary Figure 3. Sitagliptin reduces DPP4 activity and increases DPP4 protein levels in plasma and bone marrow of LPS-treated mice.** Levels of DPP4 activity (top panel) and protein (bottom panel) in (A) plasma and (B) bone marrow from WT mice that were fed a HFFC diet for 4 days and treated with LPS (two injections of 35  $\mu$ g each, one on the evening prior to sacrifice and the second one hour before sacrifice) or PBS vehicle.  $n=5$  mice per group. Data shown are mean  $\pm$  SEM. \* $P<0.05$ , \*\* $P<0.01$ , \*\*\* $P<0.001$ , \*\*\*\* $P<0.0001$  vs. the indicated comparator. Data were analyzed by two-way ANOVA. Source data are provided as a Source data file.



○ - DPP4i      ● + DPP4i

**Liver - 14 weeks + DPP4i**

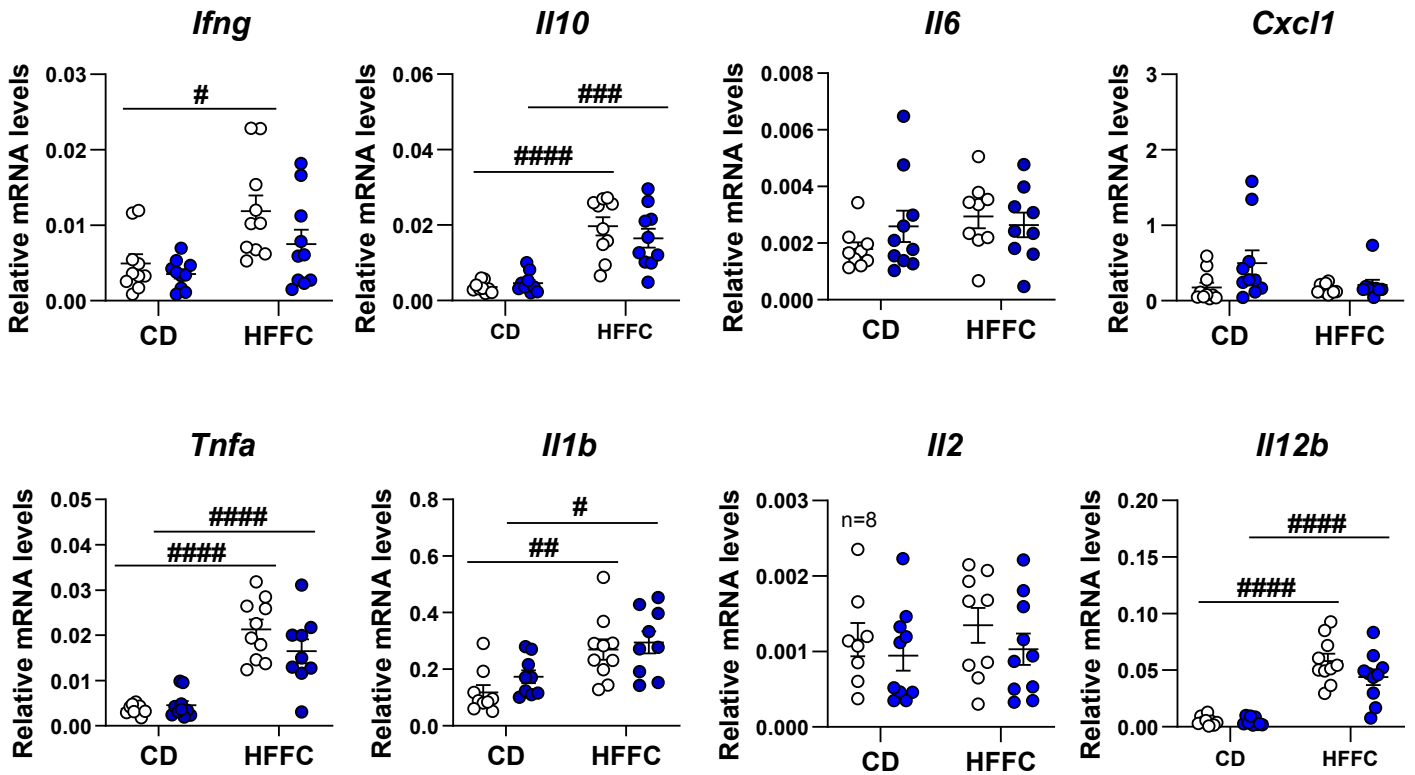

**Kidney - 14 weeks + DPP4i**

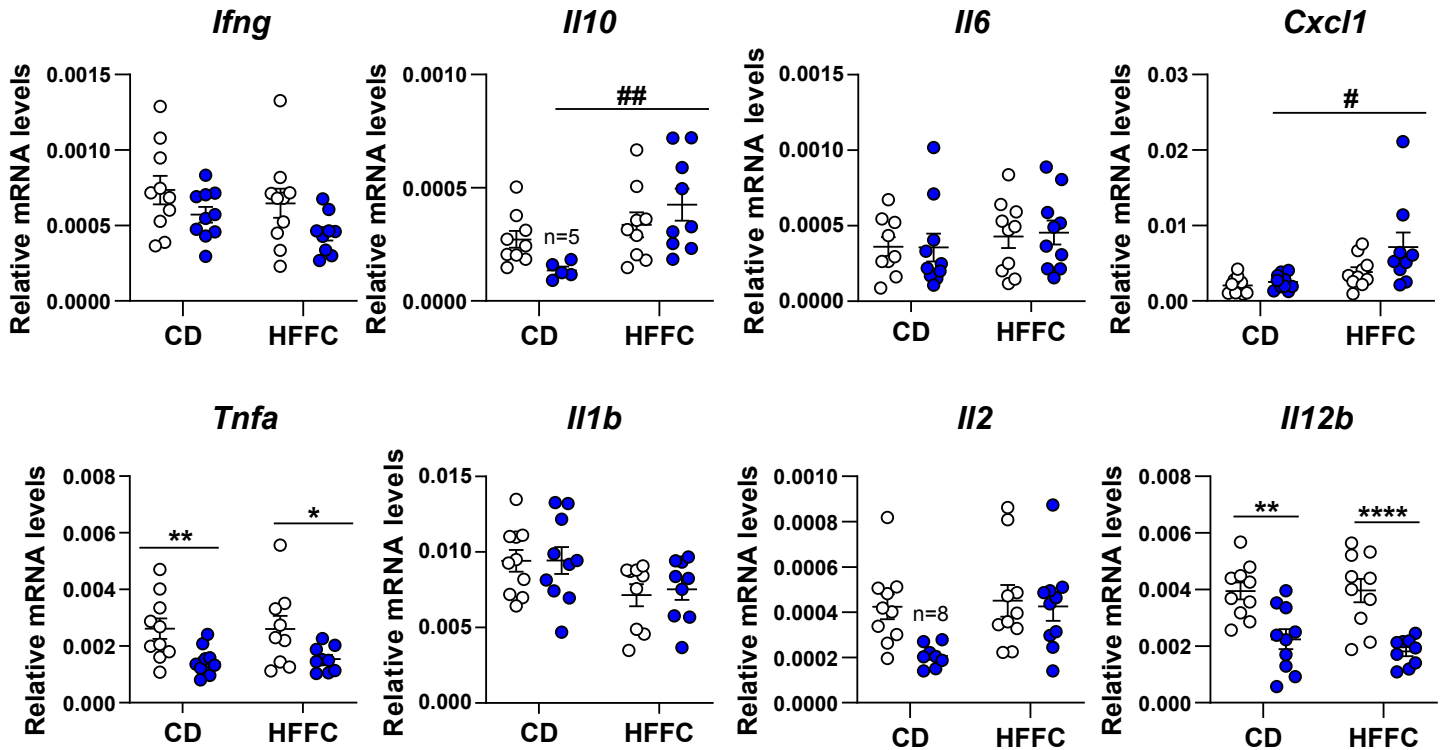

**Supplementary Figure 4. Gene expression in mouse liver and kidney after 14 wks of DPP4i.**

mRNA levels of genes central to inflammation were examined in liver (upper panels) and kidney (lower panels) samples from WT mice that were maintained on control diet (CD) or a high fat, fructose and cholesterol (HFFC) diet for 10 weeks and then the same diets supplemented with (+) or without (-) the DPP4 inhibitor (DPP4i) MK-0626 for 14 wks. Data were normalized to *Tbp* (liver) or *Rpl32* (kidney) expression and are mean  $\pm$  SEM. n=9 or 10 mice per group, except where the specific n is indicated on the graph above the data set. \* $P$ <0.05, \*\* $P$ <0.01, \*\*\*\* $P$ <0.0001 vs. DPP4i-treated. # $P$ <0.05, ## $P$ <0.01, ### $P$ <0.001, #### $P$ <0.0001 for CD vs. HFFC. Data were analyzed by two-way ANOVA. Source data are provided as a Source data file.

○ - DPP4i      ● + DPP4i

**Spleen - 14 weeks + DPP4i**

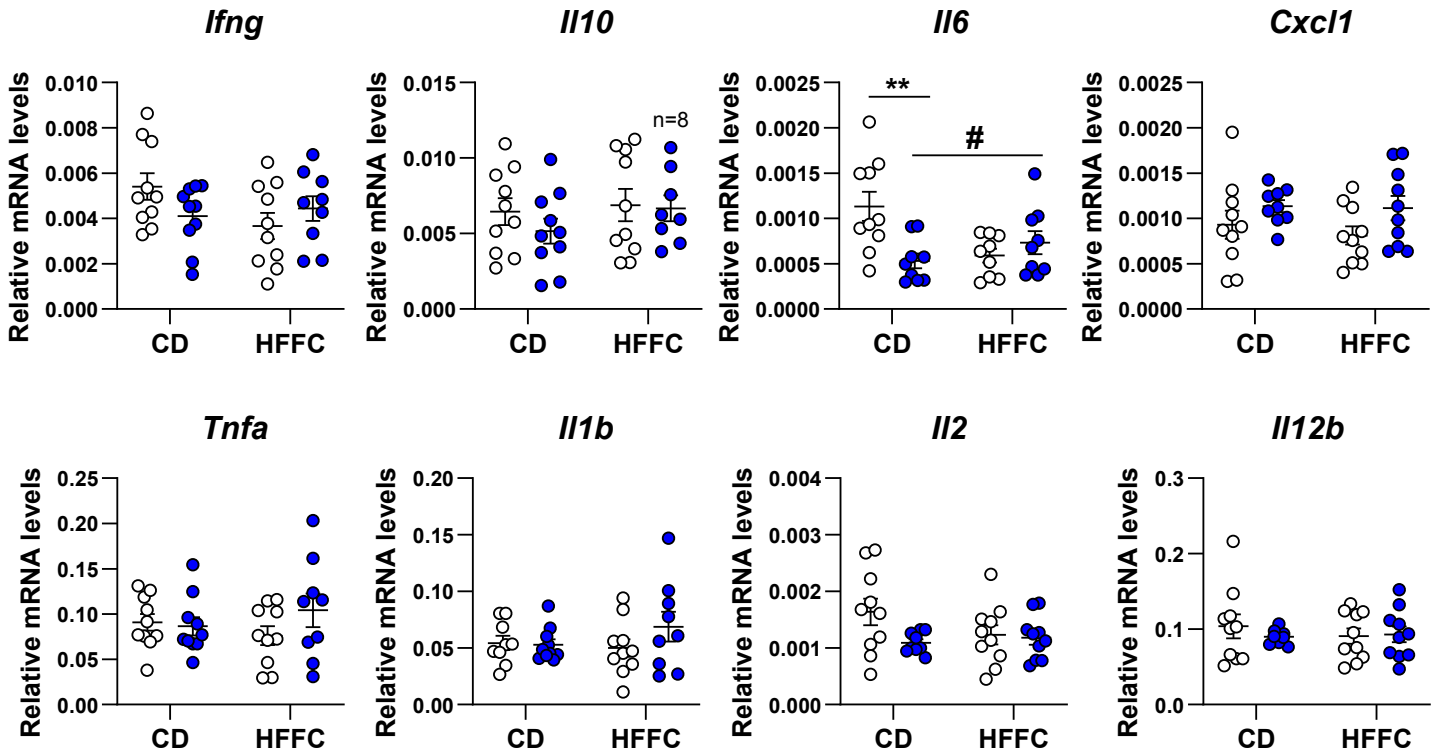

**Jejunum - 14 weeks + DPP4i**

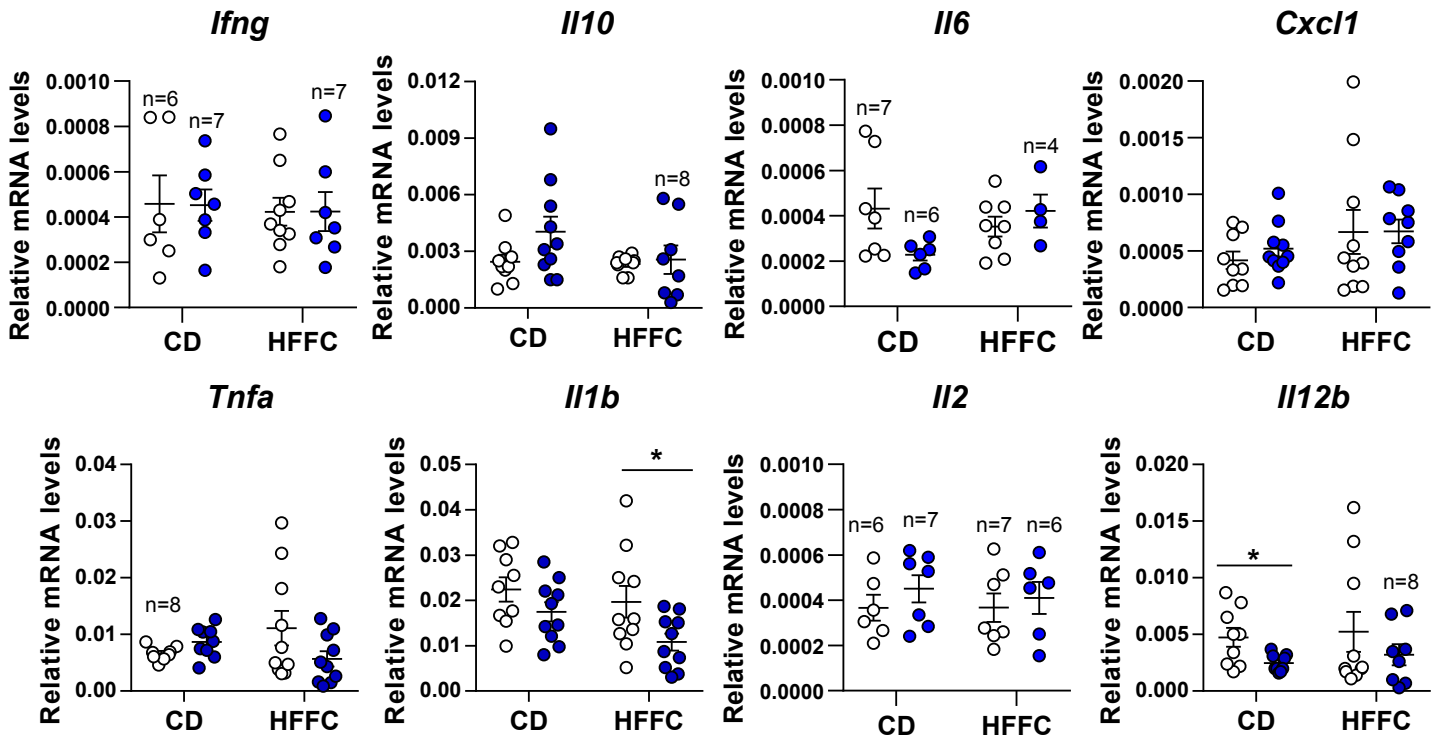

**Supplementary Figure 5. Gene expression in mouse spleen and jejunum after 14 wks of DPP4i.**

mRNA levels of genes central to inflammation were examined in spleen (upper panels) and jejunum (lower panels) samples from WT mice that were maintained on control diet (CD) or a high fat, fructose and cholesterol (HFFC) diet for 10 weeks and then the same diets supplemented with (+) or without (-) the DPP4 inhibitor (DPP4i) MK-0626 for 14 wks. Data were normalized to *Rpl32* expression and are mean  $\pm$  SEM. n=9 or 10 mice per group, except where the specific n is indicated on the graph above the data set. \* $P$ <0.05, \*\* $P$ <0.01 vs. DPP4i-treated. # $P$ <0.05 for CD vs. HFFC. Data were analyzed by two-way ANOVA. Source data are provided as a Source data file.

○ - DPP4i      ● + DPP4i

**Liver - 2 weeks + DPP4i**

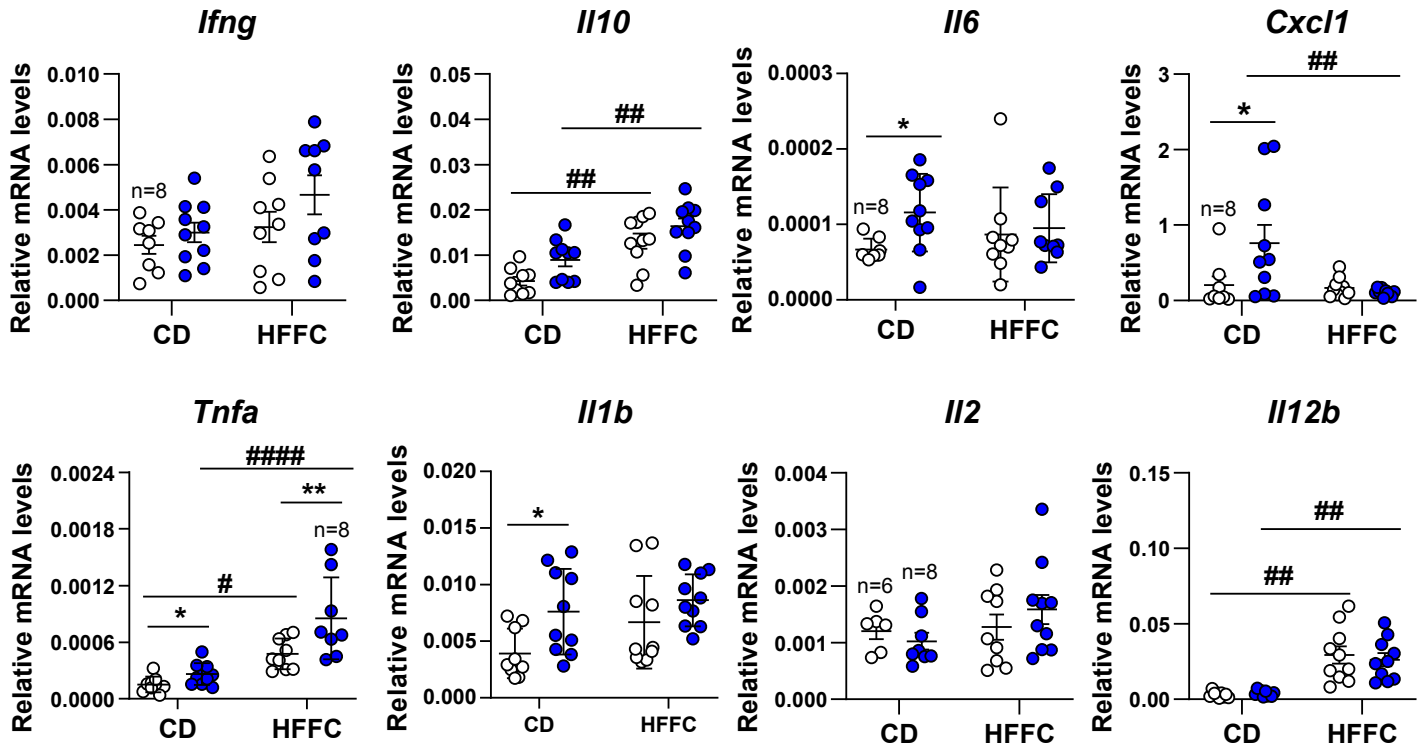

**Kidney - 2 weeks + DPP4i**

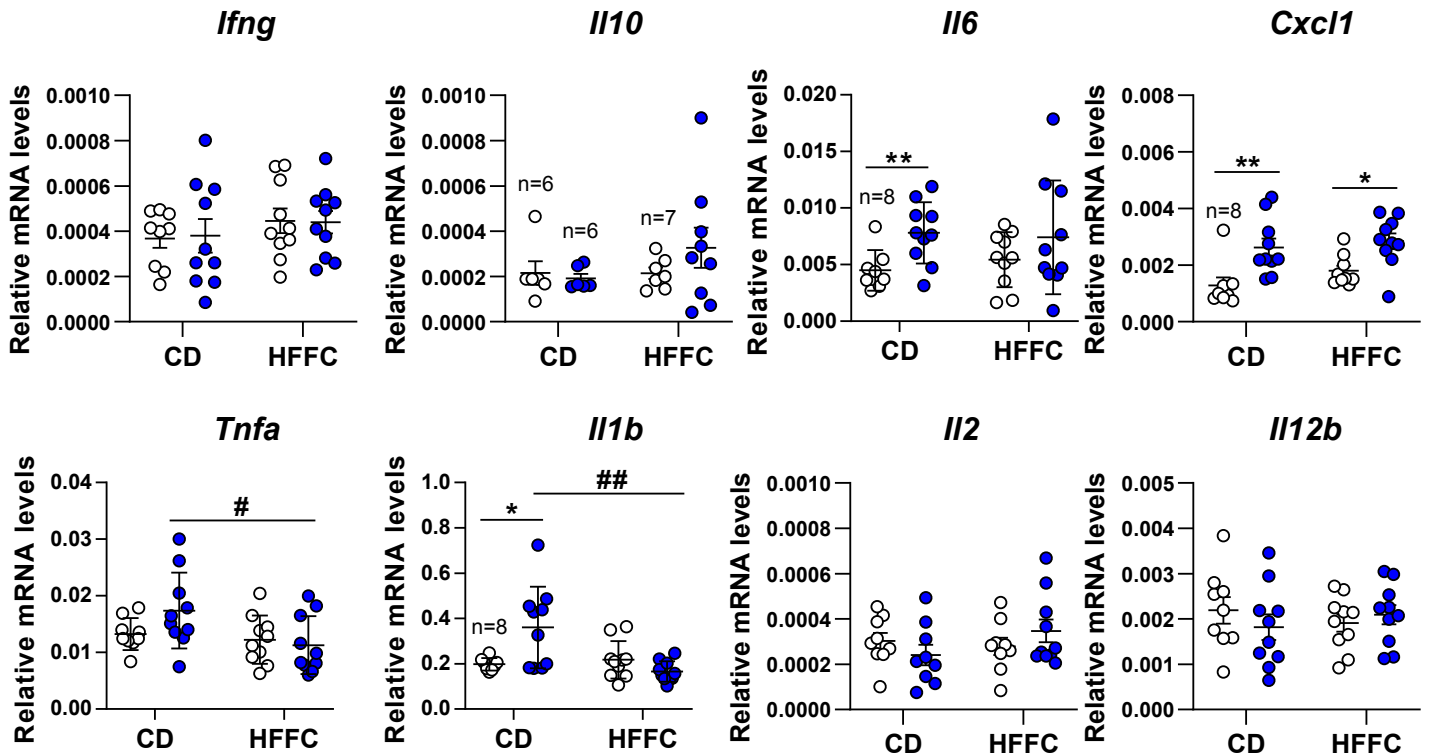

**Supplementary Figure 6. Gene expression in mouse liver and kidney after 2 wks of DPP4i.**

mRNA levels corresponding to genes important for inflammation were examined in liver (upper panels) and kidney (lower panels) samples from WT mice that were maintained on control diet (CD) or a high fat, fructose and cholesterol (HFFC) diet for 10 weeks and then the same diets supplemented with (+) or without (-) the DPP4 inhibitor (DPP4i) MK-0626 for 2 wks. Data were normalized to *Tbp* (liver) or *Rpl32* (kidney) expression and are mean  $\pm$  SEM. n=9 or 10 mice per group, except where the specific n is indicated on the graph above the data set. \* $P$ <0.05, \*\* $P$ <0.01 vs. DPP4i-treated. # $P$ <0.05, ## $P$ <0.01, #### $P$ <0.0001 for CD vs. HFFC. Data were analyzed by two-way ANOVA. Source data are provided as a Source data file.

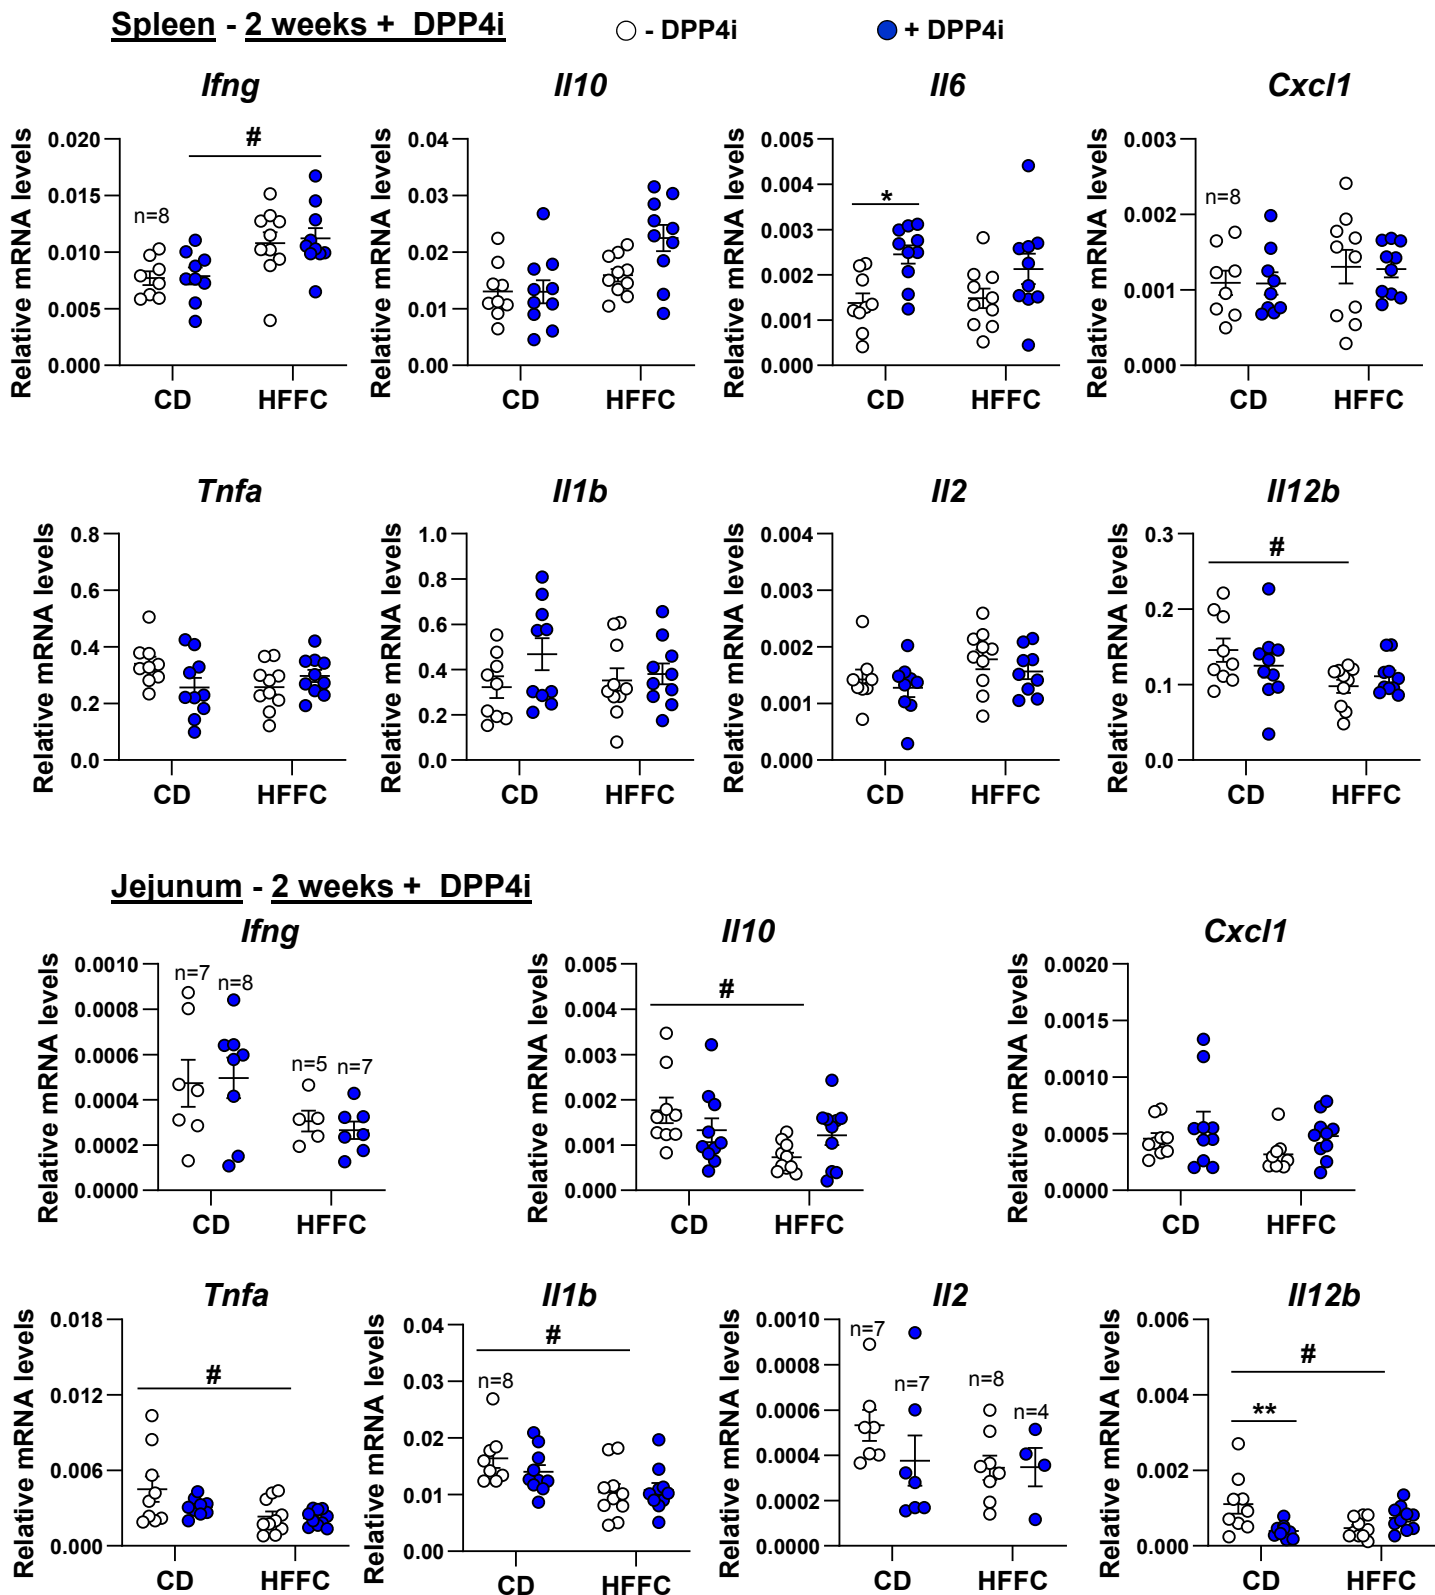

**Supplementary Figure 7. Gene expression in mouse spleen and jejunum after 2 wks of DPP4i.** mRNA levels of genes central to inflammation were examined in spleen (upper panels) and jejunum (lower panels) samples from WT mice that were maintained on control diet (CD) or a high fat, fructose and cholesterol (HFFC) diet for 10 weeks and then the same diets supplemented with (+) or without (-) the DPP4 inhibitor (DPP4i) MK-0626 for 2 wks. Data were normalized to *Rp132* expression and are mean  $\pm$  SEM.  $n=9$  or  $10$  mice per group, except where the specific  $n$  is indicated on the graph above the data set. \* $P<0.05$ , \*\* $P<0.01$  vs. DPP4i-treated. # $P<0.05$  for CD vs. HFFC. Data were analyzed by two-way ANOVA. Source data are provided as a Source data file.

**A** 8 wk-old *Glp1r<sup>+/+</sup>* or *Glp1r<sup>-/-</sup>* male mice:

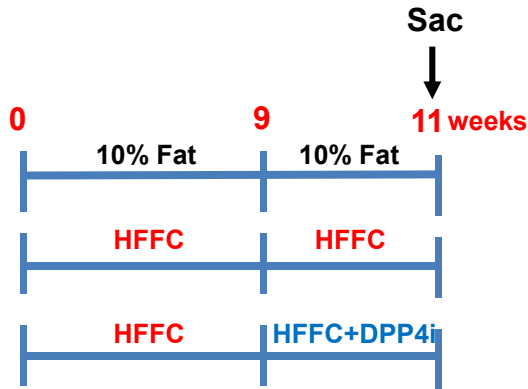

DPP4i = DPP4 inhibitor (15.5 mg of MK-0626 per 4057 kcal diet)

**B** ○ *Glp1r<sup>+/+</sup>* CD (n=6)                      ■ *Glp1r<sup>-/-</sup>* CD (n=6)  
○ *Glp1r<sup>+/+</sup>* HFFC (n=7)                      □ *Glp1r<sup>-/-</sup>* HFFC (n=7)  
● *Glp1r<sup>+/+</sup>* HFFC + DPP4i (n=8)                      ■ *Glp1r<sup>-/-</sup>* HFFC + DPP4i (n=7)

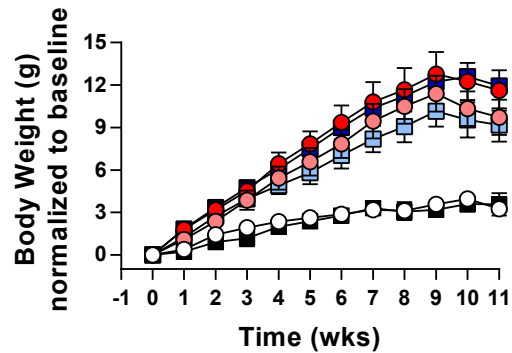

□ CD                      ■ HFFC                      ■ HFFC + DPP4i

Plasma

**C**

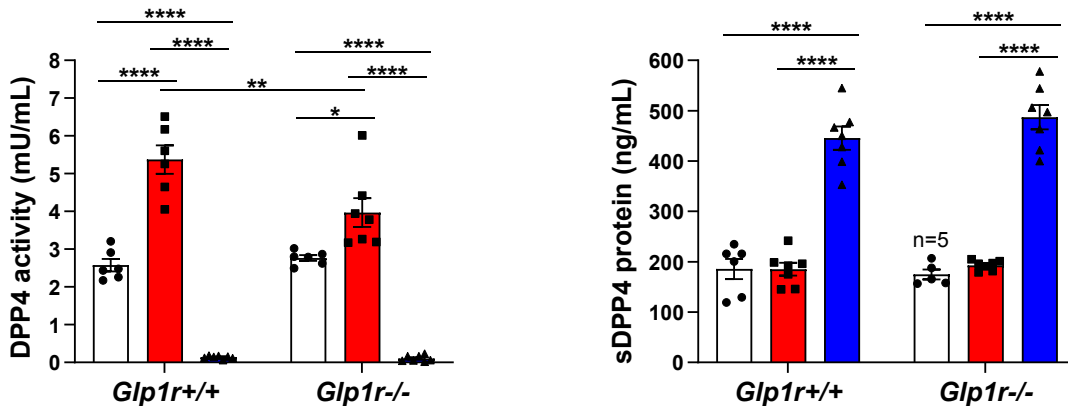

**D**

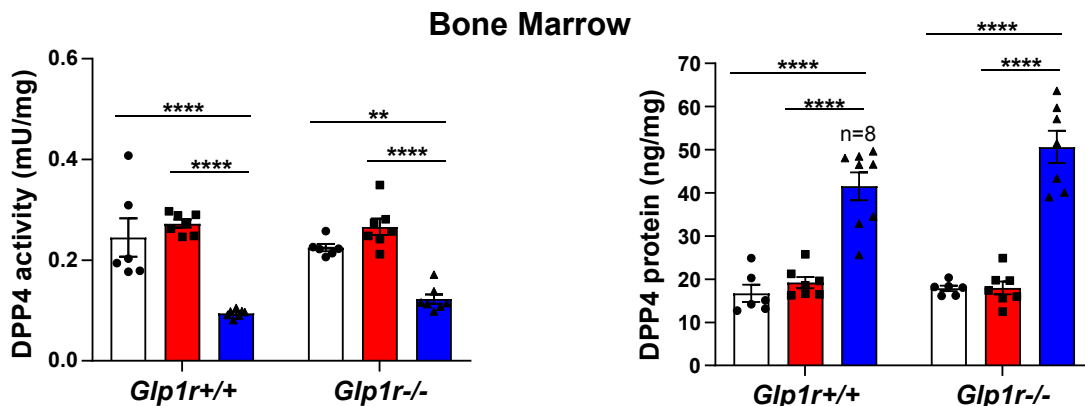

**Supplementary Figure 8.** (A) Schematic depicting the diet regimen and time of sacrifice (Sac) in the *Glp1r<sup>+/+</sup>* and *Glp1r<sup>-/-</sup>* mouse studies. (B) Weekly body weights of *Glp1r<sup>+/+</sup>* and *Glp1r<sup>-/-</sup>* mice maintained on a control diet (CD) or a high fat, fructose and cholesterol (HFFC) diet for 11 wks, or HFFC diet for 9 wks and then switched to HFFC diet supplemented with (+) the DPP4 inhibitor (DPP4i) MK-0626 (MK) for 2 wks. (C-D) Levels of DPP4 activity (left panels) and protein (right panels) in (C) plasma and (D) bone marrow from *Glp1r<sup>+/+</sup>* and *Glp1r<sup>-/-</sup>* mice maintained on CD or HFFC diet for 11 wks +/- DPP4i for the final 2 wks. Data shown are mean  $\pm$  SEM. For C and D, n=6 or 7, except where the specific n is indicated on the graph above the data set. \* $P < 0.05$ , \*\* $P < 0.01$ , \*\*\*\* $P < 0.0001$  vs. the indicated comparator. Data were analyzed by two-way ANOVA. Source data are provided as a Source data file.



○ Control Diet    ● HFFC Diet    ● HFFC + DPP4i

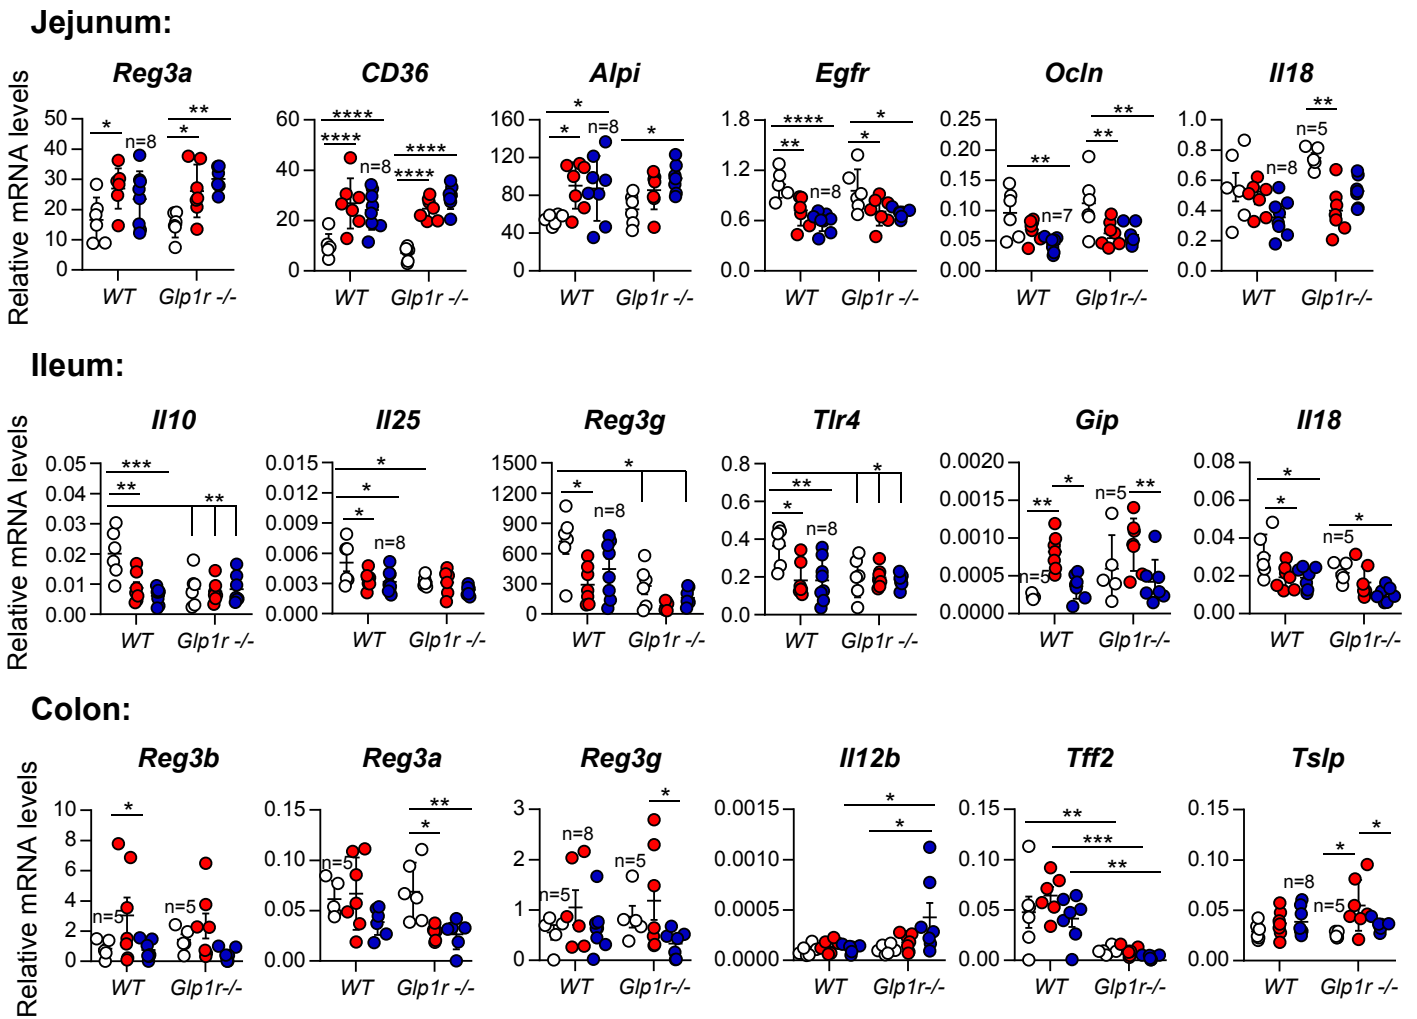

**Supplementary Figure 9. Gene expression in *Glp1r<sup>+/+</sup>* and *Glp1r<sup>-/-</sup>* mouse intestine.** mRNA levels of genes important for inflammation or epithelial protection and repair were assessed in jejunum, ileum and colon samples from *Glp1r<sup>+/+</sup>* (WT) and *Glp1r<sup>-/-</sup>* mice maintained on a control diet (10% fat) or a high fat, fructose and cholesterol (HFFC) diet for 11 wks, or HFFC diet for 9 wks and then switched to HFFC diet supplemented with (+) the DPP4 inhibitor (DPP4i) MK-0626 for 2 wks. Data were normalized to *Ppia* or *Tbp* and are mean  $\pm$  SEM. n=6 or 7 mice per group, except where the specific n is indicated on the graph above the data set. \* $P < 0.05$ , \*\* $P < 0.01$ , \*\*\* $P < 0.001$ , \*\*\*\* $P < 0.0001$  vs. the indicated comparator. Data were analyzed by two-way ANOVA. Source data are provided as a Source data file.

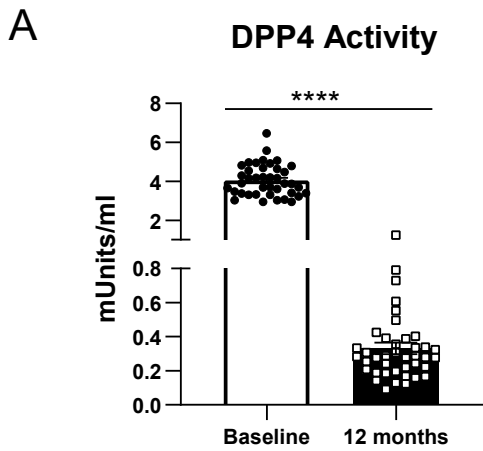

**B** sDPP4 Protein (Thermo Fisher):

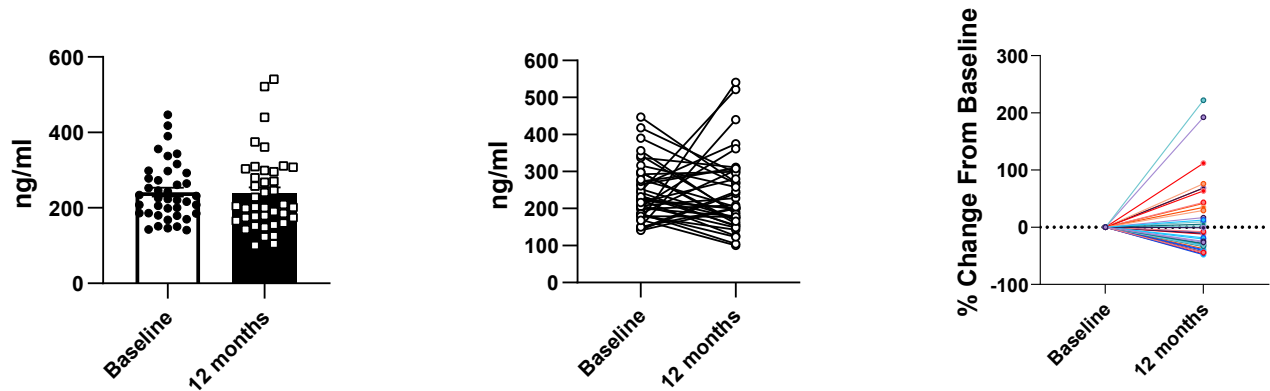

**C** sDPP4 Protein (RayBiotech):

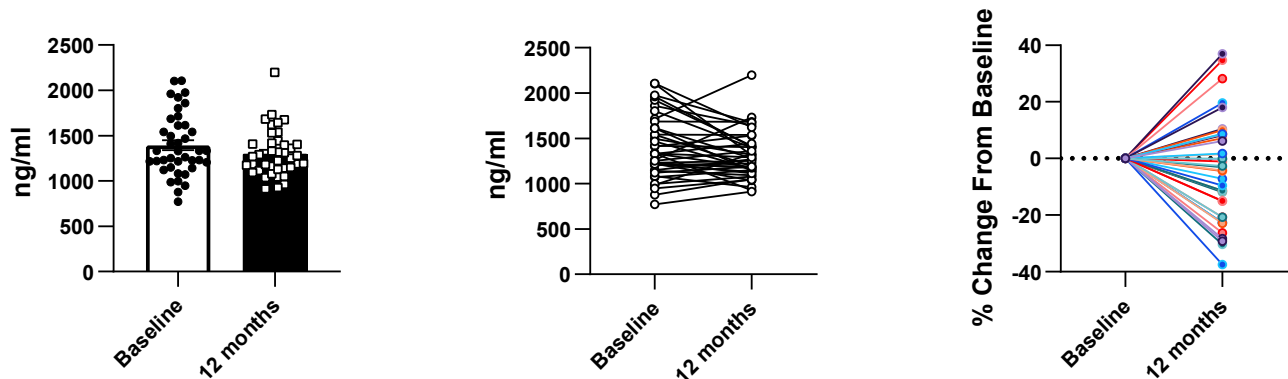

**Supplementary Figure 10. Plasma levels of sDPP4 vary widely among TECOS trial patients.**

(A) DPP4 activity and (B, C) sDPP4 protein levels at baseline and month 12 in plasma samples from a subset of patients from the TECOS trial (n=40 patients) that received sitagliptin. Plasma sDPP4 levels were measured using assay kits from two independent sources (B, C). In B and C, data are shown as individual values in a scatter plot (left panels), summary data with a line connecting the baseline data to the 12 month data (center panels), or percent change from baseline (right panels). Data are mean  $\pm$  SEM. \*\*\*\* $P$ <0.0001 vs. the indicated comparator. Data were analyzed by two-sided unpaired Student's t-test.
